# Supplementary material
Source: PubMed Central journal article supplement (PMC4641504)
Supplement: embr0016-1520-sd2.pdf [file embr0016-1520-sd2.pdf]

## Data Set EV1

### DDSR1 full length sequence

AAAAGCATAACATCAAAGCCTAAAATTACAAAGGAAAAGAGTGGAAAATTCATCCCCATAAATATTA AAAA ACTAGT  
GTGTTGCAAATAAATTCAAAAGATAAGGGAAATACTGGGGAAAATATCTGAAACATGACAGAGTGCATTAAATAT  
ATCATGGGCTTTTACATTTTAGAAAAAATGACGGATATCTCACTAGTGAAAAGACTATAGGAAATGAAGAAGTA  
ATTCACAGAAAAAGGGTCAACTCCATTTATCAGAGAAATGCAAATGAAATCAGGATTGCATTCCTTACCTGTCAAA  
TTGGCAGATGCAACAATAGCTGGTACTTACTGAGCCCTTCTGTGTTAGCTACTAGTCTAAGAGCTACCACCACTCA  
TACATATGTAAAGGCTAATGGAGTTGTAAATGTAACCTTTGAGGACTTTATTGTATGTATGCGTATTAGTCTGTTCT  
CACACTGCTAATAAAGACATACCCGAGACTGGGTAATTTATAAAGGAAAAGGAGGTTAATGGACTCACAGTTCCA  
CATGGCTGAGGAGACCTCACAATCATGGTAGAGGGTAAAGGGGTAGAAAGTCATGTCTTACATGGCAGCAGGCA  
AGAGAGCTTGTGTAGGGGAGCTCCCCTTTATAAAACCATCAGACCTGGTGAGACTTATTCACATGAGAACAGCATA  
AGAAAGACCCGCCCGATGATTCAGTTACCTCCCACCAGGTCCTCCTACAACACGTGAGAATTATGGGAGCTACA  
ATTCAAGATGAGATTTGGGTGGGGACACAGCCAAAACATATCAGTATGTTATGGCCTTATATAAAAGTTGTTTTGT  
TTGTAAGCAGTTTGCCTACAGTGTGTGAAAGTGCATCACTGTTGTGCCTTGTTGTCCAACCTTTGCTTACCCT  
GATGCTTAGGTGTGAGTTGATGGCAGTTTGGCATTGGAGAGCAGTTGCACTCCTAAAATGAGTGAAATGTTCTCT  
TCAAACCTGTGGCGTACCGTCTTTCTATGGCTCTGTGACAGTTACAGATCCGAAAATTAGGTGTAATGGCTTTTGAA  
GCAAAAATCTCATTCTGAATAAATCTCCCATCTGTTCCAATAACATTTTAATTGCGCATCGAATATGGTACTTATTTT  
TAAAAACTGCCTAGCAGGATAGTTTGTGTTACTCTGCCTGTATCCATGACCGTGATAAGAAATGTAAGAAAAGGCC  
AGGCATGGTGGCTCACACCTGTAATCCCAGCACTTTGGGAGGCCAAGGTGGGTGGATCACCTGAGGTCAGGAATC  
CAGACAAGCCTGGCCAGCATGGAGAAACCCTGTCTTTATTA AAAA ATATA AAAA ATGAGCCAGATGCGGTGGTGCAT  
ATCTGTAATCCCAGCTACTTGGGAGGCTGAGGCAGGAGAATCGCTTGAACCCAGGAGGTGGAGGTTGGAGTGAG  
CGAAGATCATGCCACTGCACTCCAGCCTGGGTGACAGAGAGACAGACTGTCTCAAAAAAAAAAAAAAAAAAATGT  
AAGAAAAGAGGTTGGGTCTTATTTTCATTTGTATTTCTCTCACTGCCTAGCATAGTGCCTTTCACTCAGTTGGAATAT  
ATAATAAATGTTCAATAACTG
